# Supplementary material for: A highly sensitive nucleic acid stain based on amino-modified tetraphenylethene: the influence of configuration
Source: Royal Society of Chemistry journal article supplement (doi:10.1039/c4cc02671c), 2014-01-01
Supplement: c4cc02671c1.pdf [file c4cc02671c1.pdf]

## Electronic Supplementary Information (ESI)

### Highly Sensitive Nucleic Acid Stain Based on Amino-Modified Tetraphenylethene: The Influence of Configuration

Li Xu, Zece Zhu, Xiang Zhou, Jingui Qin and Chuluo Yang\*

*Hubei Collaborative Innovation Center for Advanced Organic Chemical Materials, Hubei Key Lab on Organic and Polymeric Optoelectronic Materials, Department of Chemistry, Wuhan University, Wuhan, 430072, People's Republic of China, E-mail: clyang@whu.edu.cn*

#### Experimental Details

**Instrumentation.**  $^1\text{H}$  NMR and  $^{13}\text{C}$  NMR spectra were measured on a MECUYRVX300 or 600 spectrometer. Elemental analyses of carbon, hydrogen, and nitrogen were performed on a Vario EL III microanalyzer. Mass spectra were measured on a Micromass-ZQ mass spectrophotometer. Fluorescence spectra were recorded on a Hitachi F-4500 fluorescence spectrophotometer. Water was purified using a Millipore filtration system.

**Fluorescence Measurements.** Subsequent fluorescence titration experiments were carried out at room temperature by addition of DNA into the deionized water or buffer solutions with 10  $\mu\text{M}$  dyes. The mixtures were vortex mixed and stood for 10 minutes prior to the measurements. All the titration experiments were carried out three times for calculating error bars.

**Electrophoresis and gel conditions.** DNA was electrophoresed in 1.0mm-thick 18% polyacrylamide gels in 1×TBE buffer (89 mM Tris, 89 mM boric acid, 2 mM EDTA, pH 8.3) at 158 V/cm for 1.2 h. To determine sensitivity limits for oligodeoxynucleotides, dilutions containing 40 ng to 10 ng random-sequence oligonucleotide size markers (a mixture of equal mass oligonucleotides with 10, 20, and 30 bases in length) in formamide loading buffer were electrophoresed in lane 1 to 3. To determine sensitivity limits for dsDNA in polyacrylamide gels, dilutions containing 133.6 ng to 16.7 ng per lane Ultra Low Range DNA ladder were used in lane 4 to 8, which means 12 ng to 1 ng per band at 300 bp and 42 ng to 3.5 ng per band at 50 bp.

The gels were incubated in 10  $\mu\text{M}$  dye-containing solutions for 30 min, then photographed using a 300-nm UV transillumination. EB staining was performed using a 10  $\mu\text{M}$  solution of dye in deionized water, while the gel was stained for 30 min in a light-proof container. No special destaining was performed for any of these dyes, but briefly washed two times with water. For sensitivity comparisons, the photographic conditions were optimized for gels stained by dyes.

**Materials.** Oligonucleotides (X10, X20, X30) were purchased from Sangon Biotech (Shanghai) Co., Ltd. ctDNA was purchased from Sigma. GeneRuler Ultra Low Range DNA Ladder was purchased from Thermo Scientific. All the other reagents were commercially available and used without further purification.

**Table S1.** Synthetic ssDNA used in this study

| ID  | sequence                                |
|-----|-----------------------------------------|
| X30 | 5'-GGTGCTAACT GGTGCTAACT GGTGCTAACT -3' |
| X20 | 5'-GGTGCTAACT GGTGCTAACT -3'            |
| X10 | 5'-GGTGCTAACT-3'                        |

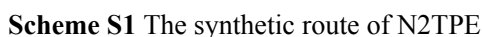

**Z-N2TPE and E-N2TPE.** A mixture of **3** (0.5 g, 1 mmol) and PPh<sub>3</sub> (1.07 g, 4 mmol) in THF (120 ml) and H<sub>2</sub>O (20 mL) was stirred at 60°C overnight. After concentration, the residue was purified by silica gel chromatography using chloroform/methanol/ammonium hydroxide (100:10:1, v/v/v) as eluent. The Z-N2TPE and E-N2TPE were obtained as white powers in 41% yield (0.18 g) and 44% yield (0.19 g), respectively. A single crystal of *cis* isomer in the form of dihydrochloride was obtained by diffusion of ether into a methanol solution in presence of 2 equiv of hydrochloric acid solution.

*Z*-N2TPE.  $^1\text{H}$  NMR (300 MHz,  $\text{CDCl}_3$ ),  $\delta$  (ppm): 7.07 (m, 6H), 7.02 (m, 4H), 6.95 (d,  $J$  = 8.1Hz, 4H), 6.67 (d,  $J$  = 8.1Hz, 4H), 3.92 (t,  $J$  = 5.1Hz, 4H), 3.05 (t,  $J$  = 5.1Hz, 4H).  $^{13}\text{C}$  NMR (150 MHz,  $\text{CDCl}_3$ ),  $\delta$ (ppm): 157.31, 144.21, 139.70, 136.63, 132.60, 131.46, 127.63, 126.27, 113.68, 69.90, 41.61. Anal. Calcd for  $\text{C}_{30}\text{H}_{30}\text{N}_2\text{O}_2$ : C, 79.97; H, 6.71; N, 6.22; Found: C, 79.78; H, 6.75; N, 6.31. ESI-MS:  $m/z[\text{M}+\text{H}]^+$  451

*E*-N2TPE.  $^1\text{H}$  NMR (300 MHz,  $\text{CDCl}_3$ ),  $\delta$  (ppm): 7.10 (m, 6H), 7.05-7.02 (m, 4H), 6.92 (d,  $J$  = 8.7Hz, 4H), 6.64 (d,  $J$  = 8.7 Hz, 4H), 3.90 (t,  $J$  = 4.8Hz, 4H), 3.03 (t,  $J$  = 4.8Hz, 4H).  $^{13}\text{C}$  NMR (150 MHz,  $\text{CDCl}_3$ ),  $\delta$ (ppm): 157.30, 144.28, 139.66, 136.54, 132.62, 131.43, 127.75, 126.27, 113.58, 69.92, 41.61. Anal. Calcd for  $\text{C}_{30}\text{H}_{30}\text{N}_2\text{O}_2$ : C, 79.97; H, 6.71; N, 6.22; Found: C, 79.82; H, 6.50; N, 6.06. ESI-MS:  $m/z[\text{M}+\text{H}]^+$  451

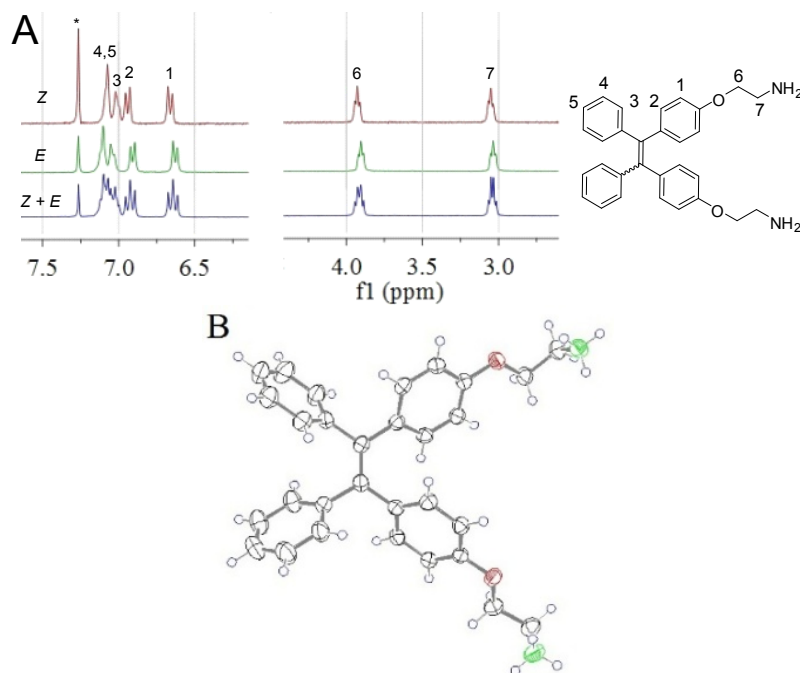

**Fig. S1** (A)  $^1\text{H}$ -NMR spectra of *cis*, *trans* and mixture of amino-functionalized TPE in  $\text{CDCl}_3$ . The solvent peaks are marked with asterisks. (B) Oak ridge thermal ellipsoidal plot (ORTEP) diagram of *Z*-N2TPE- $\text{H}^+$ . Counterions have been omitted for clarity.

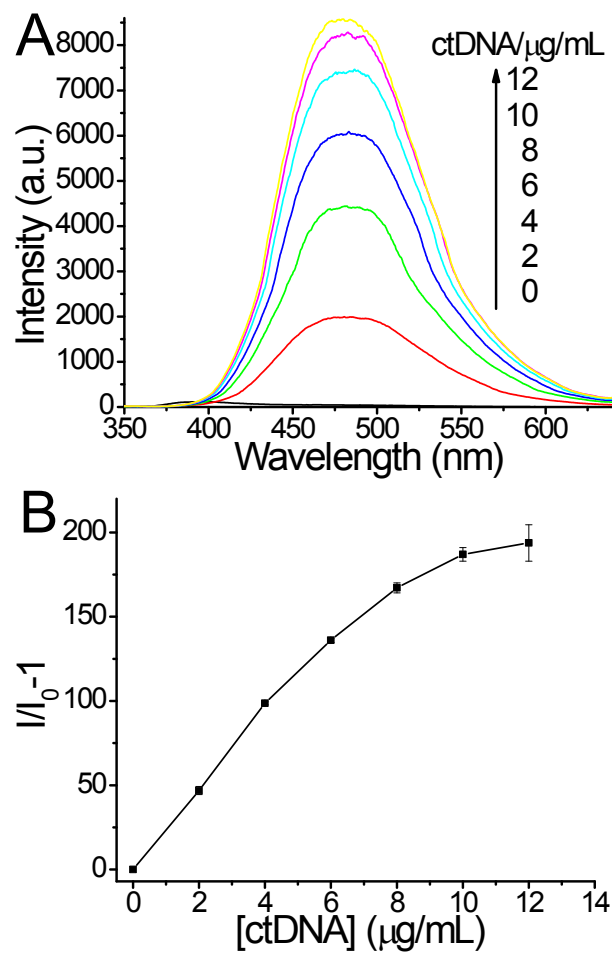

**Fig. S2** (A) Fluorescence titration of ctDNA to 10  $\mu\text{M}$  Z-N2TPE in deionized water. (B) Plot of  $I/I_0 - 1$  at 480 nm versus ctDNA concentration.  $I_0$  = emission intensity in the absence of oligonucleotide. ctDNA is Calf Thymus DNA, a natural dsDNA. [Z-N2TPE] = 10  $\mu\text{M}$ ;  $\lambda_{\text{ex}}$  = 330 nm,  $\lambda_{\text{em}}$  = 480 nm, Error bars are  $\pm\text{SD}$ .

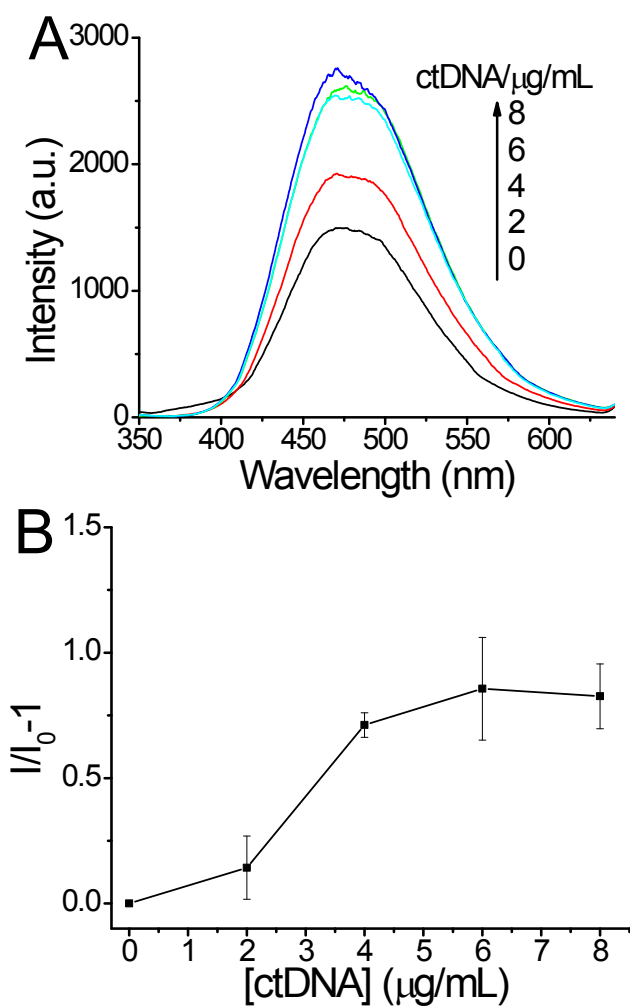

**Fig. S3** (A) Fluorescence titration of ctDNA to 10  $\mu$ M *E*-N2TPE in deionized water. (B) Plot of  $I/I_0 - 1$  at 480 nm versus ctDNA concentration.  $I_0$  = emission intensity in the absence of oligonucleotide. ctDNA is Calf Thymus DNA, a natural dsDNA. [*E*-N2TPE] = 10  $\mu$ M;  $\lambda_{\text{ex}}$  = 330 nm,  $\lambda_{\text{em}}$  = 480 nm, Error bars are  $\pm$ SD.

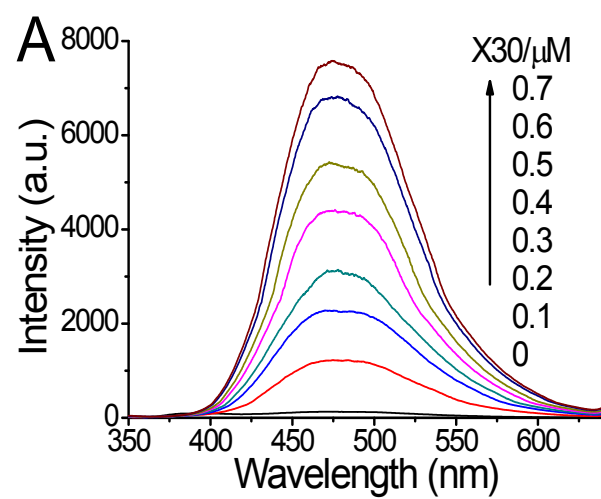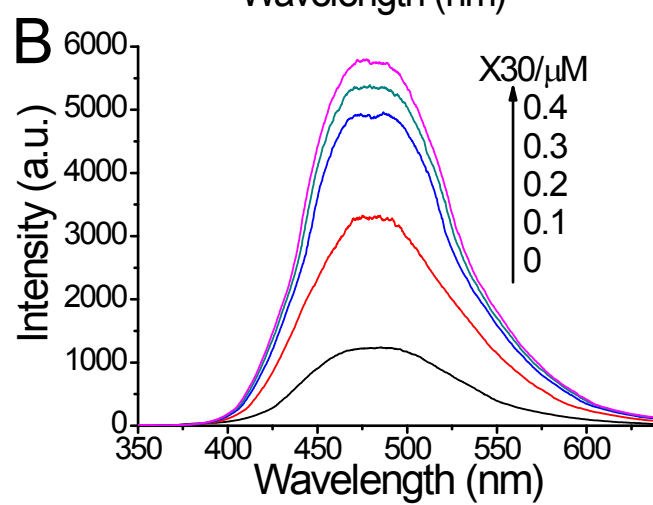

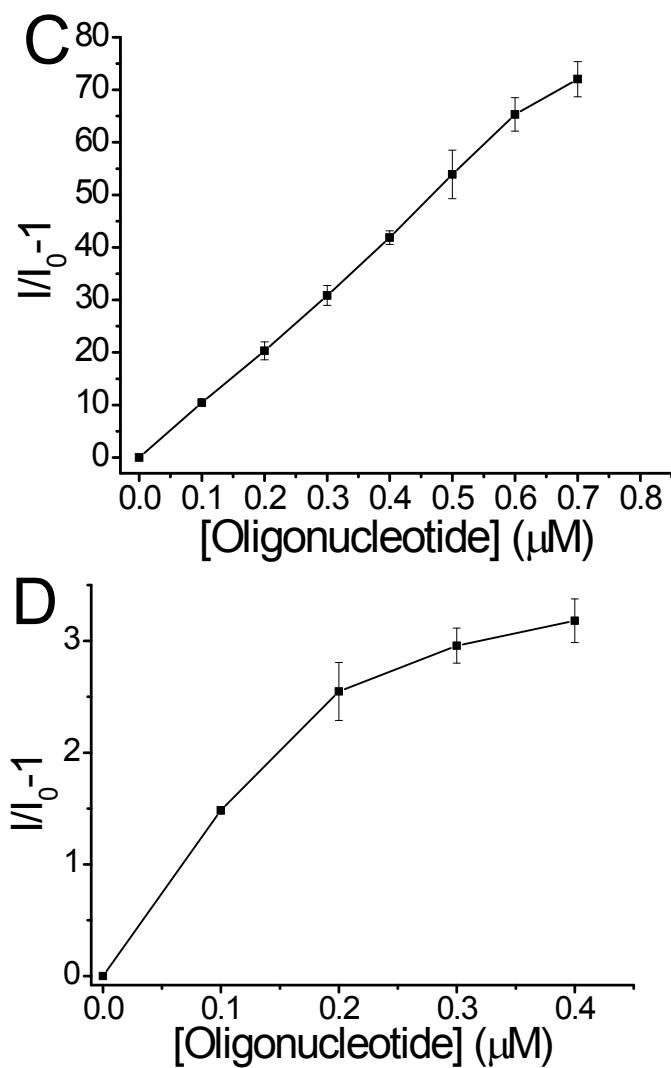

**Fig. S4** Fluorescence titration of X30 to Z-N2TPE in 10 mM HEPES pH = 5.0 (A) and pH = 7.0 (B). Plot of  $I/I_0 - 1$  at 480 nm versus X30 concentration in 10 mM HEPES pH = 5.0 (C) and pH = 7.0 (D).  $I_0$  = emission intensity in the absence of oligonucleotide. X30 is a synthetic oligonucleotide with 30nt. [Z-N2TPE] = 10  $\mu\text{M}$ ;  $\lambda_{\text{ex}}$  = 330 nm,  $\lambda_{\text{em}}$  = 480 nm, Error bars are  $\pm\text{SD}$ .

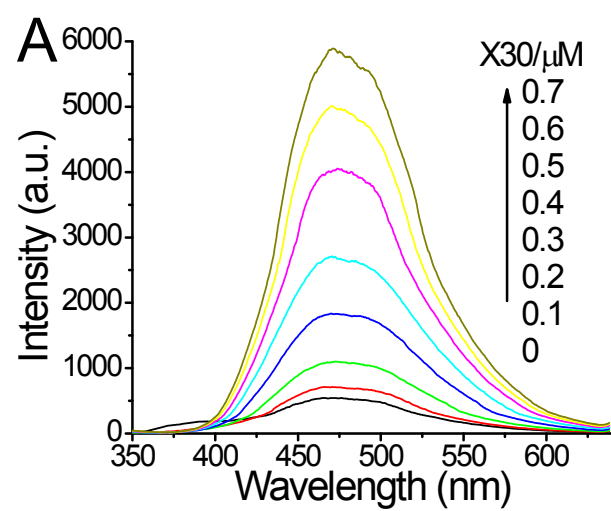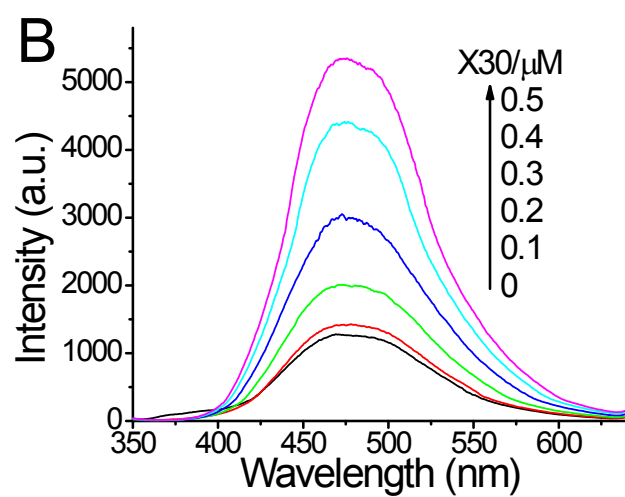

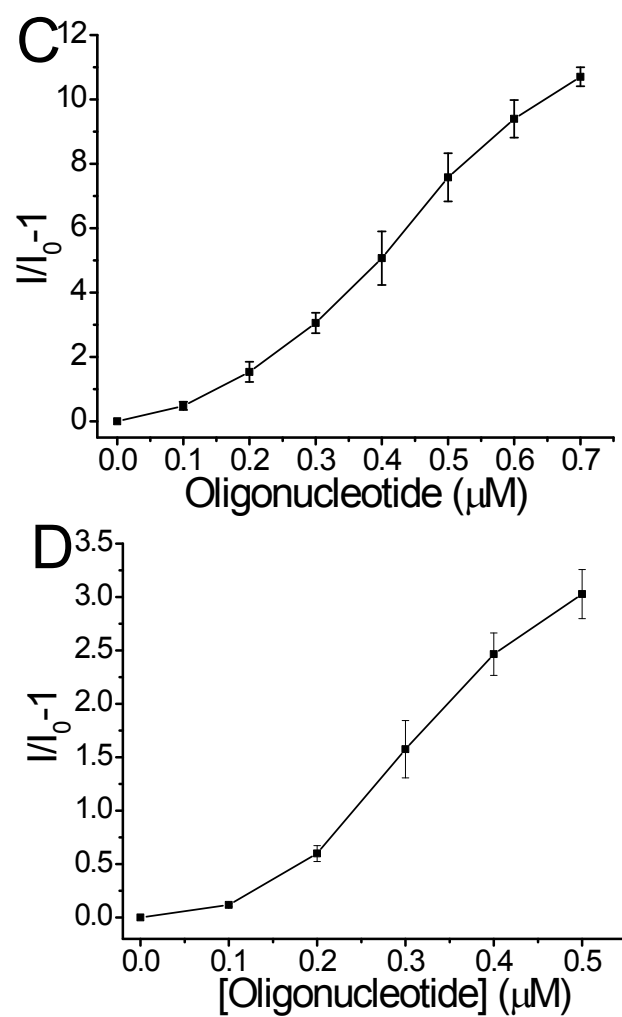

**Fig. S5** Fluorescence titration of X30 to *E*-N2TPE in 10 mM HEPES pH = 5.0 (A) and pH = 7.0 (B). Plot of  $I/I_0 - 1$  at 480 nm versus X30 concentration in 10 mM HEPES pH = 5.0 (C) and pH = 7.0 (D).  $I_0$  = emission intensity in the absence of oligonucleotide. X30 is a synthetic oligonucleotide with 30nt.  $[E\text{-}N2TPE] = 10\mu\text{M}$ ;  $\lambda_{\text{ex}} = 330\text{ nm}$ ,  $\lambda_{\text{em}} = 480\text{ nm}$ , Error bars are  $\pm\text{SD}$ .
